# Supplementary material for: TET2 functions as a resistance factor against DNA methylation acquisition during Epstein-Barr virus infection
Source: PubMed Central journal article supplement (PMC5348409; doi:10.18632/oncotarget.13130), 2016-11-05
Supplement: oncotarget-07-81512-s001.pdf [file oncotarget-07-81512-s001.pdf]

## TET2 functions as a resistance factor against DNA methylation acquisition during Epstein-Barr virus infection

### SUPPLEMENTARY FIGURES AND TABLES

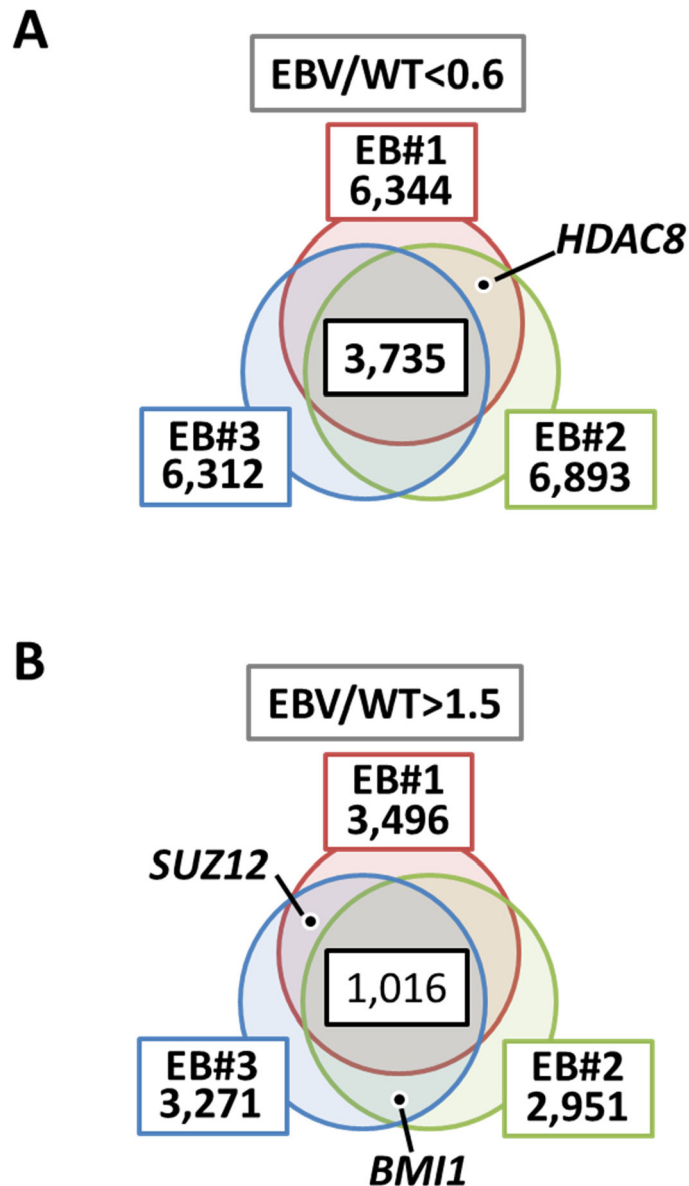

**Supplementary Figure S1: The genes downregulated and upregulated by EBV infection.** **A.** The epigenetic factors downregulated by EBV infection include *HDAC8*, which was downregulated in two of EBV-infected MKN7 clones. **B.** The epigenetic factors upregulated by EBV infection include *SUZ12* and *BMI1*, which were upregulated in two of EBV-infected MKN7 clones.

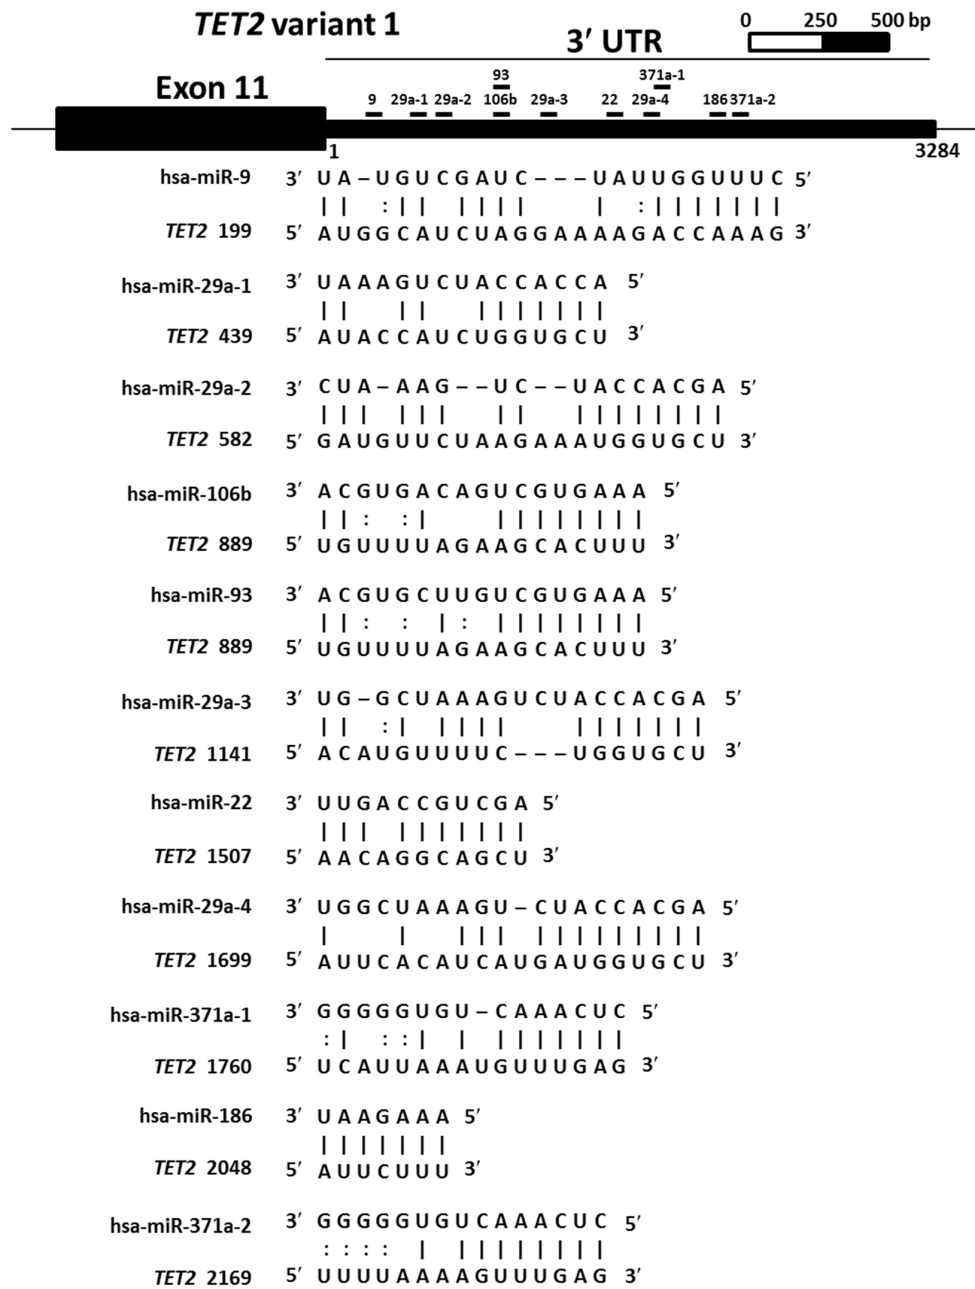

**Supplementary Figure S2: The predicted target regions of 7 miRNAs targeting TET2.** hsa-miR-29a has 4 sites and has-miR-371a has 2 sites to bind 3' UTR of TET2.

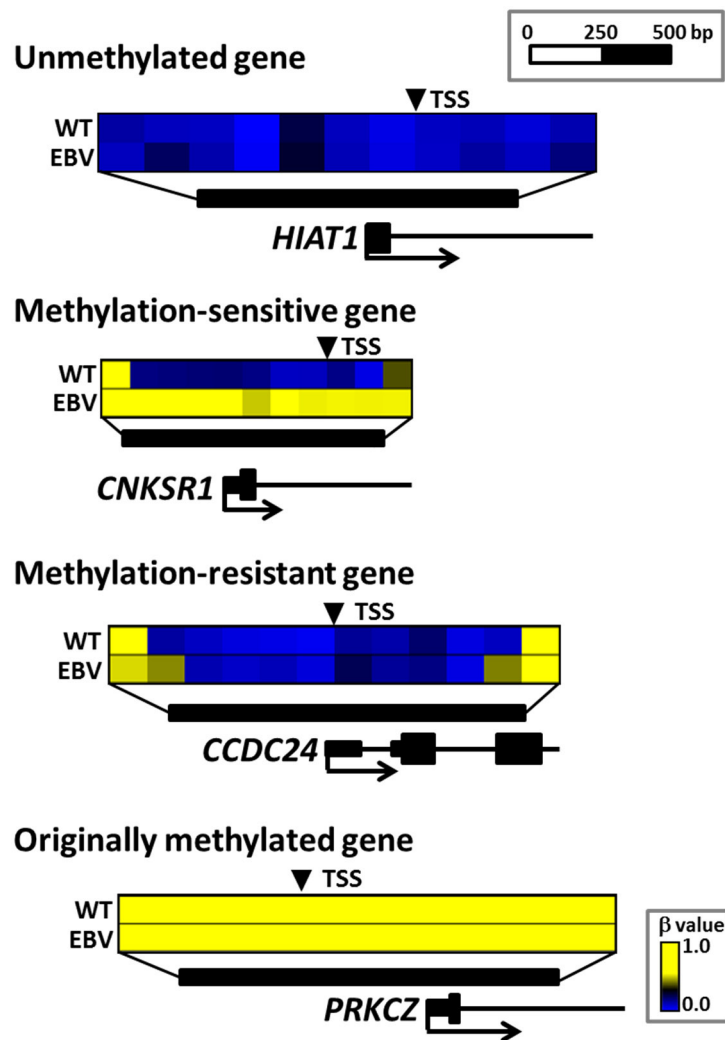

**Supplementary Figure S3: Representation of an unmethylated gene (*HIAT1*), a methylation-sensitive gene (*CNKSR1*), a methylation-resistant gene (*CCDC24*), and an originally methylated gene (*PRKCZ*) during EBV infection.** When *de novo* methylation is induced by EBV infection, there are two types of methylation acquisition around promoter regions. Methylation-sensitive genes undergo complete methylation around the promoter regions; methylation-resistant genes undergo methylation in regions surrounding their promoters, but maintain an unmethylated status in narrow regions around the TSS.

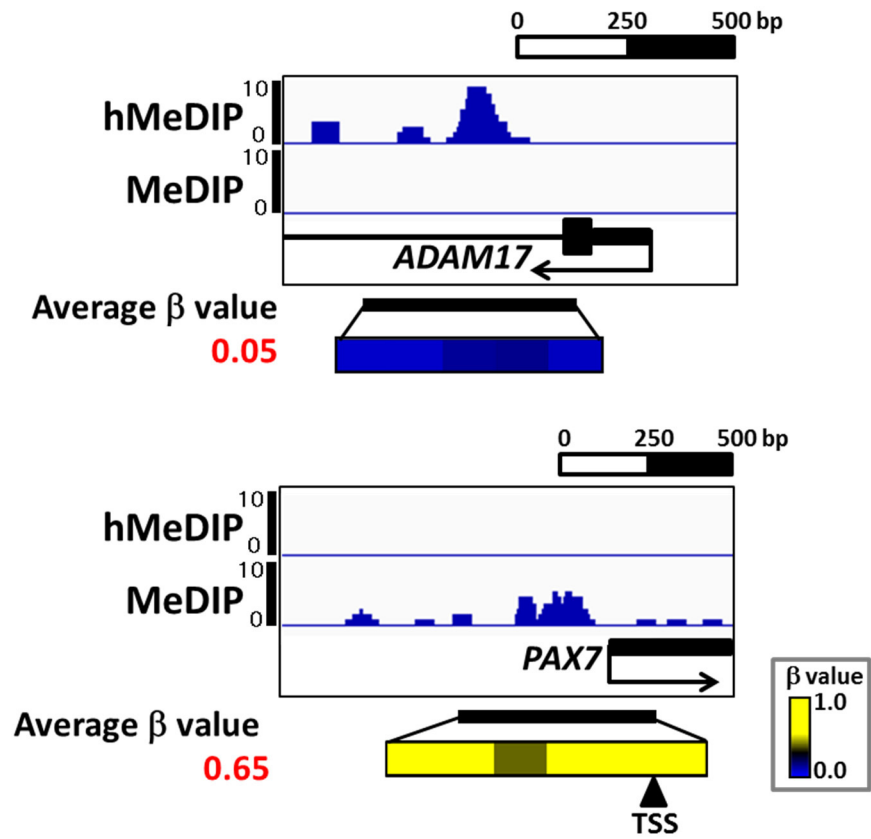

**Supplementary Figure S4: Representative genes with an hmC peak, but no mC peak, e.g., *ADAM17*, and those with mC peak and no hmC peak, e.g., *PAX7*, are shown. The  $\beta$  values of the former genes were very low, e.g., 0.05 for *ADAM17*. The  $\beta$  values of the latter genes were markedly higher, e.g., 0.65 for *PAX7*.**

**Supplementary Table S1: EBV miRNA and the targeting human genes**

See Supplementary File 1

Supplementary Table S2: shRNA target sequences in lentivirus

| target gene | strand | sequence                                                   |
|-------------|--------|------------------------------------------------------------|
| <i>TET2</i> | top    | CCGGCAGATGCACAGGCCAATTAAGCTCGAGCTTAATTGGCCTGTGCATCTGTTTTG  |
|             | bottom | AATTCAAAAACAGATGCACAGGCCAATTAAGCTCGAGCTTAATTGGCCTGTGCATCTG |
| Non-target  | top    | CCGGCAACAAGATGAAGAGCACCAACTCGAGTTGGTGCTCTTCATCTTGTTGTTTTG  |
|             | bottom | AATTCAAAAACAACAAGATGAAGAGCACCAACTCGAGTTGGTGCTCTTCATCTTGTTG |

Oligonucleotide sequences of shRNA against *TET2* (shTET2) and control non-target shRNA (shNON), inserted into pLKO.1 vector between EcoRI and AgeI sites, are shown, and 21-mer target sequences are underlined.

Supplementary Table S3: Primer sequences for real-time RT-PCR

| Gene         | Primer types | Primer Sequence          | Anneal (°C) | Product (bp) |
|--------------|--------------|--------------------------|-------------|--------------|
| <i>TET1</i>  | Forward      | CTTACAGAGTTTGGCTACACGAT  | 60          | 93           |
|              | Reverse      | CGGGCAACATTTTCATATTCCAC  |             |              |
| <i>TET2</i>  | Forward      | ATTGAAACAAGACCAAAAAGGCTA | 60          | 109          |
|              | Reverse      | CTTATCACTCAAATCGGAGACA   |             |              |
| <i>TET3</i>  | Forward      | CCACGGCTTCCAGACAGACCAC   | 60          | 91           |
|              | Reverse      | CAGGGGCAGCTTTCTCCGTTCCCA |             |              |
| <i>GAPDH</i> | Forward      | CCAGGTGGTCTCCTCTGACTTC   | 60          | 108          |
|              | Reverse      | TCATACCAGGAAATGAGCTTGACA |             |              |
| <i>PPIA</i>  | Forward      | ACAGTGCTTGCTGGCAGTTAGA   | 60          | 130          |
|              | Reverse      | CAAATCCGCCACCTCTAGGATAG  |             |              |

**Supplementary Table S4: Buffers for DIP experiment**

---

|                |                                                                                  |
|----------------|----------------------------------------------------------------------------------|
| IP Buffer      | 20 mM tris-HCl pH8.0<br>2 mM EDTA<br>150 mM NaCl<br>1.0% Triton-X100             |
| Wash Buffer    | 20 mM Tris-HCl pH8.0<br>2 mM EDTA<br>300 mM NaCl<br>0.1% SDS<br>1.0% Triton-X100 |
| Elution Buffer | 25 mM Tris-HCl pH8.0<br>10 mM EDTA<br>0.5% SDS<br>100 mM NaCL                    |

---



Supplementary Table S5: Primers for hMeDIP/MeDIP-PCR

| Gene                            | Primer types | Primer Sequence           | Anneal (°C) | Product (bp) | hMe/Me  |
|---------------------------------|--------------|---------------------------|-------------|--------------|---------|
| <i>Positive control regions</i> |              |                           |             |              |         |
| <i>NEDD9</i>                    | Forward      | GCTTCATGCCTGCTACATATACTCC | 60          | 106          | hMe, Me |
|                                 | Reverse      | TGTGGTCTGTTTGTGTGTAAGAGG  |             |              |         |
| <i>HMGA2</i>                    | Forward      | CATGCAGAGCAGCGATTTAAA     | 60          | 99           | hMe     |
|                                 | Reverse      | GCCTTTCTTCTTGCTTTAGGACAA  |             |              |         |
| <i>ACTB</i>                     | Forward      | GAGGGAAATGAGGGCAGGACTT    | 60          | 127          | hMe     |
|                                 | Reverse      | GCTGCCCTGAGGCACTCTTC      |             |              |         |
| <i>AJAP1</i>                    | Forward      | CGAGCCAGGTCTGAGGC         | 60          | 77           | Me      |
|                                 | Reverse      | GGTCGCTCACCTGAGTCCTA      |             |              |         |
| <i>Negative control region</i>  |              |                           |             |              |         |
| <i>HBB</i>                      | Forward      | GGGCTGAGGGTTTGAAGTCC      | 60          | 89           | hMe, Me |
|                                 | Reverse      | CCACAGGGTGAGGTCTAAGTG     |             |              |         |
| <i>Validation region</i>        |              |                           |             |              |         |
| <i>FRG1B</i>                    | Forward      | CTTCCTCCATCTCTATCGGGCAA   | 60          | 73           | hMe     |
|                                 | Reverse      | CTAATCCTGGAGGCGGCATCTGA   |             |              |         |

Supplementary Table S6: Primers for pyrosequencing

| Gene         | strand | Primer types | Primer Sequence              | Anneal (°C) | Product (bp) |
|--------------|--------|--------------|------------------------------|-------------|--------------|
| <i>FRG1B</i> | bottom | Forward      | GAGTGTGTGGGAATGTGG           | 56          | 101          |
|              |        | Reverse*     | TCCTCAAATACCCCCTCCAAAATTAAGT |             |              |
|              |        | Sequencing   | GGTGGAGAGTTATGGT             |             |              |
| <i>HTRAI</i> | bottom | Forward*     | GGAGAGTGTAGGAGGGTTT          | 58          | 134          |
|              |        | Reverse      | CCATCCCACCAACCCCATC          |             |              |
|              |        | Sequencing   | CACCCCTACCAAACCAATAAAGT      |             |              |

\* Primers with 5'-biotin tag.
